# Supplementary material for: Metal-free, redox-neutral, and visible light-triggered coupling of CO2 with epoxides to cyclic carbonates at atmospheric pressure
Source: Royal Society of Chemistry journal article supplement (doi:10.1039/d2gc00680d), 2022-01-01
Supplement: d2gc00680d1.pdf [file d2gc00680d1.pdf]

## Supplementary Information

### **Metal-free, Redox-neutral, Visible light-triggered Coupling of CO<sub>2</sub> with Epoxides to Cyclic Carbonates at Atmospheric Pressure**

Sandhya Saini,<sup>1,2</sup> Shafiur Rehman Khan,<sup>1</sup> Nand Kishor Gour,<sup>3</sup> Ramesh Chandra Deka<sup>3</sup> and  
Suman L Jain<sup>1\*</sup>

*<sup>1</sup>Chemical & Material Sciences Division, CSIR-Indian Institute of Petroleum, Haridwar Road,  
Mohkampur, Dehradun-248005, India*

*<sup>2</sup>Academy of Scientific and Innovative Research, Ghaziabad- 201002, India*

*<sup>3</sup>Department of Chemical Sciences, Tezpur University, Napaam, Tezpur – 784028, Assam*

\*Corresponding Author: [suman@iip.res.in](mailto:suman@iip.res.in), +911352525788

#### **Contents**

**<sup>1</sup>H and <sup>13</sup>C NMR spectra of cyclic carbonates (Figure S1- S18) ...Page No. (S2-S10)**

**$^1\text{H}$  and  $^{13}\text{C}$  NMR spectra of cyclic carbonates**

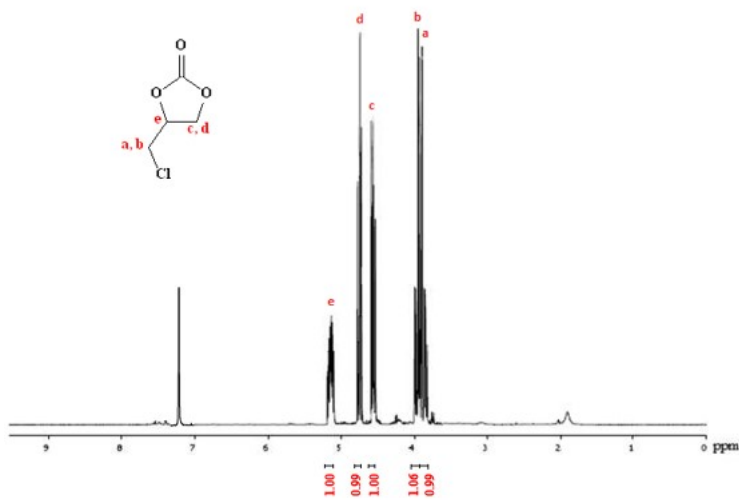

**Figure S1.**  $^1\text{H}$  NMR spectra of 4-(chloromethyl)-1,3-dioxolan-2-one (Table 2, entry 1).

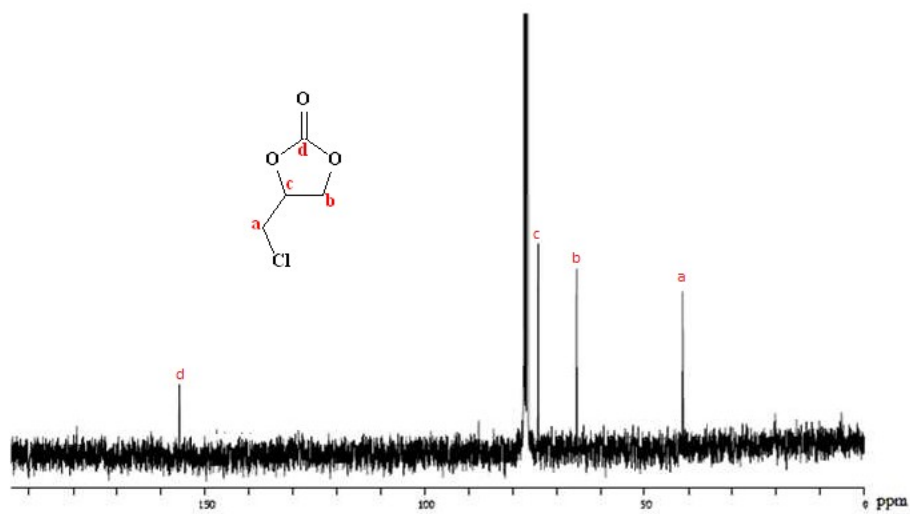

**Figure S2.**  $^{13}\text{C}$  NMR spectra of 4-(chloromethyl)-1,3-dioxolan-2-one (Table 2, entry 1).

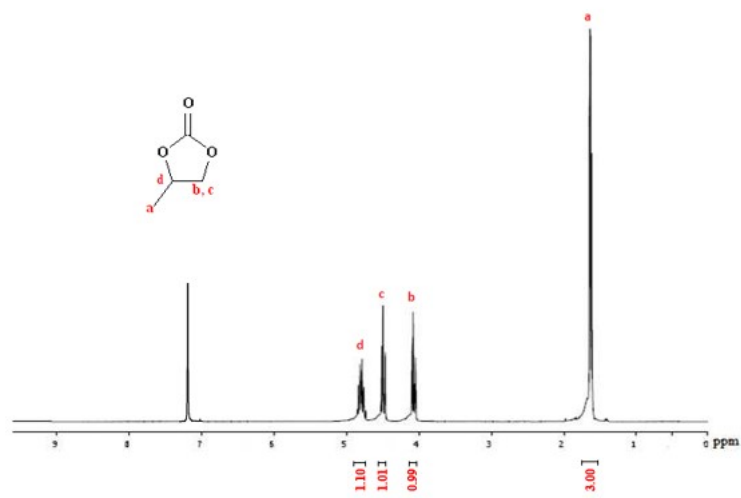

**Figure S3.** <sup>1</sup>H NMR spectra of 4-methyl-1,3-dioxolan-2-one (Table 2, entry 2).

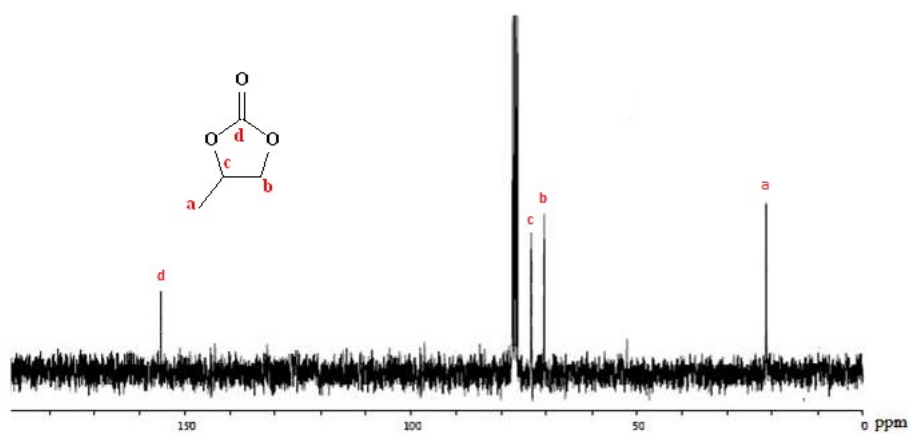

**Figure S4.** <sup>13</sup>C NMR spectra of 4-methyl-1,3-dioxolan-2-one (Table 2, entry 2).

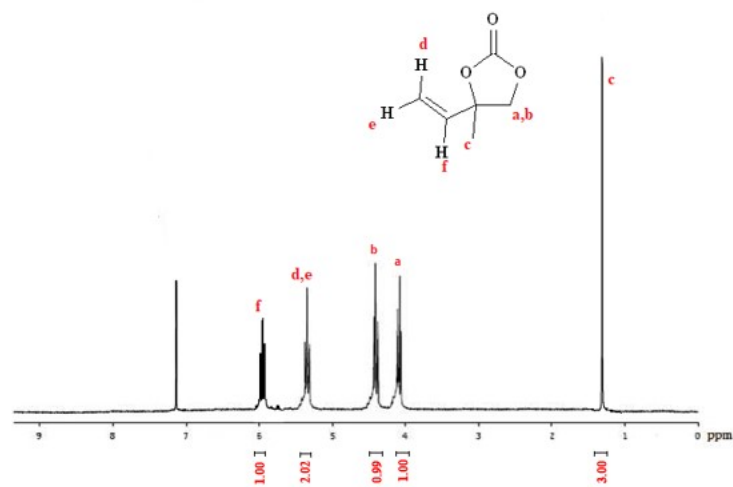

**Figure S5.**  $^1\text{H}$  NMR spectra of 4-methyl-4-vinyl-1,3-dioxolan-2-one (Table 2, entry 3).

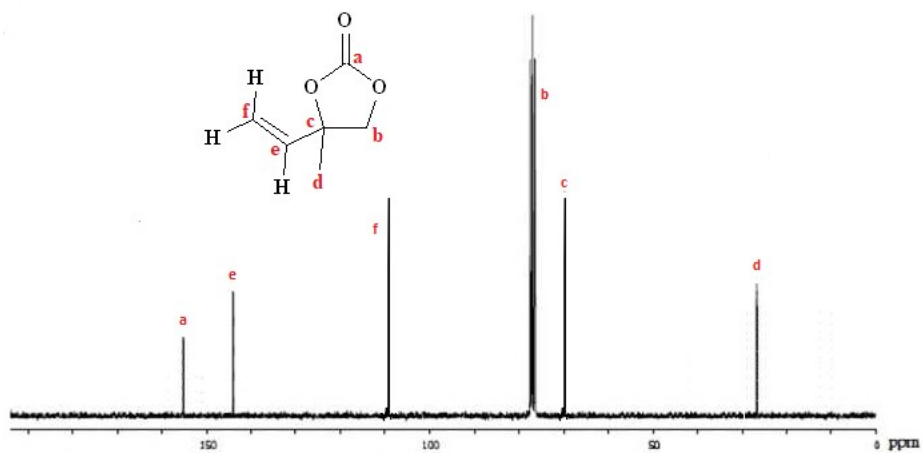

**Figure S6.**  $^{13}\text{C}$  NMR spectra of 4-methyl-4-vinyl-1,3-dioxolan-2-one (Table 2, entry 3).

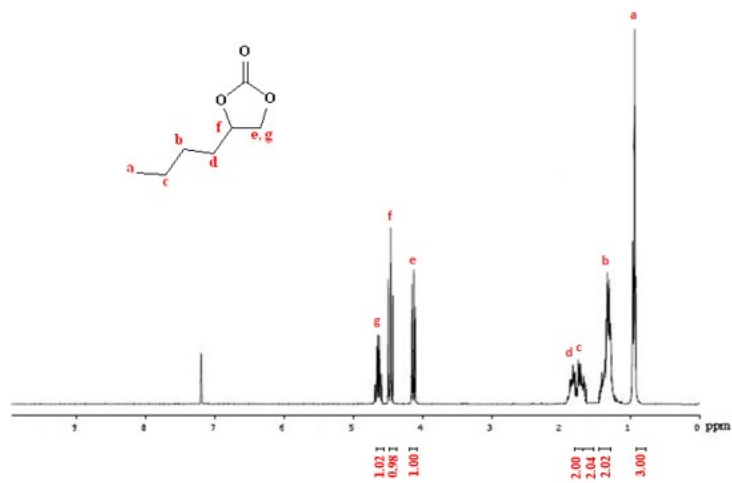

**Figure S7.** <sup>1</sup>H NMR spectra of 4-butyl-1,3-dioxolan-2-one (Table 2, entry 4).

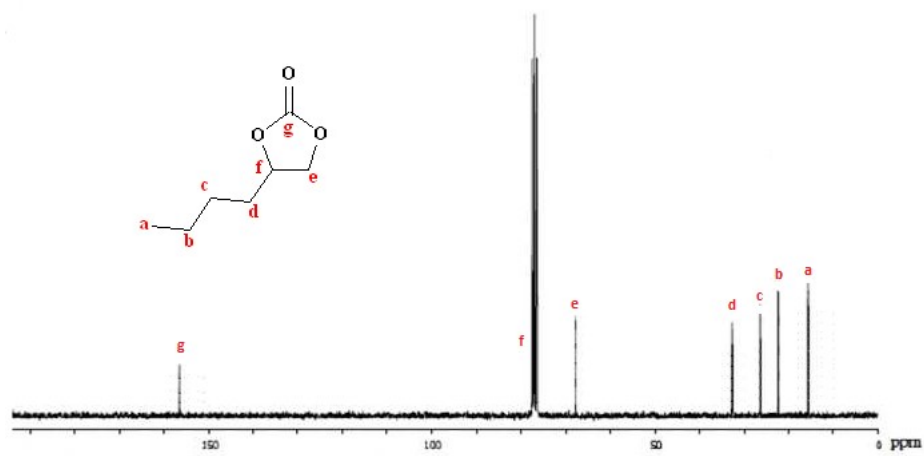

**Figure S8.** <sup>13</sup>C NMR spectra of 4-butyl-1,3-dioxolan-2-one (Table 2, entry 4).

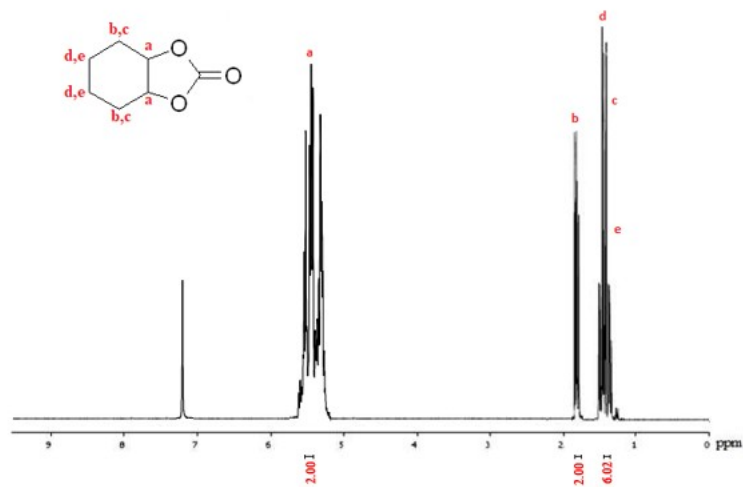

**Figure S9.** <sup>1</sup>H NMR spectra of hexahydrobenzo[d][1,3]dioxol-2-one (Table 2, entry 5).

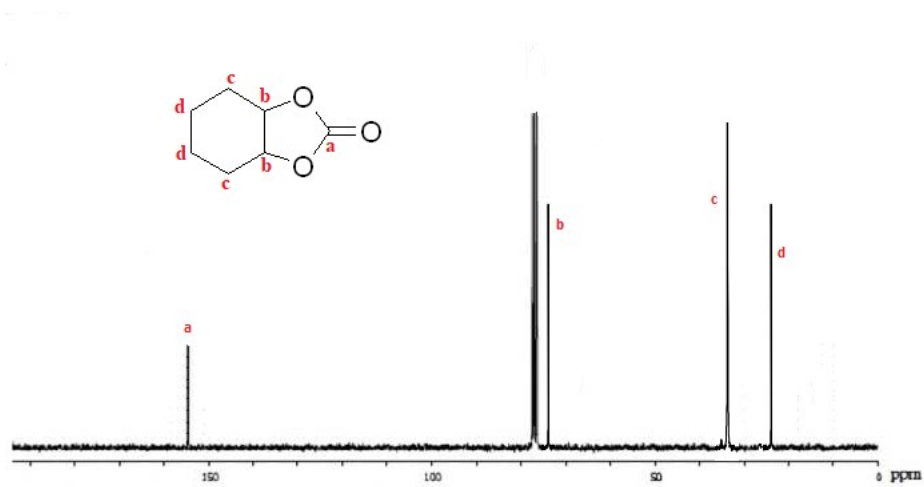

**Figure S10.** <sup>13</sup>C NMR spectra of hexahydrobenzo[d][1,3]dioxol-2-one (Table 2, entry 5).

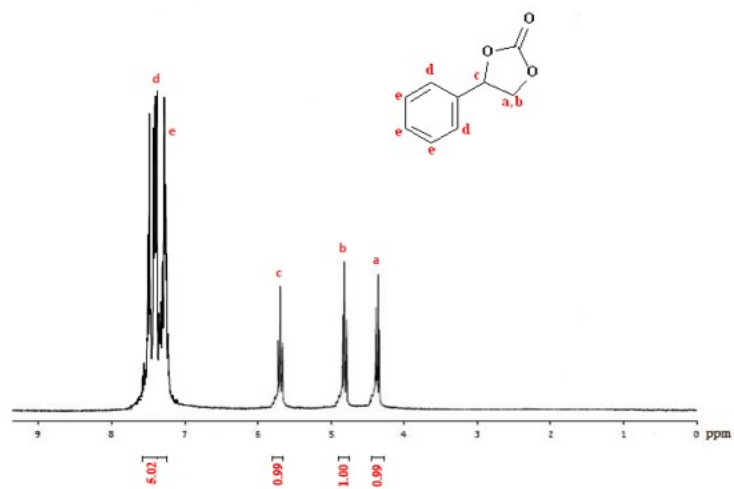

**Figure S11.**  $^1\text{H}$  NMR spectra of 4-phenyl-1,3-dioxolan-2-one (Table 2, entry 6).

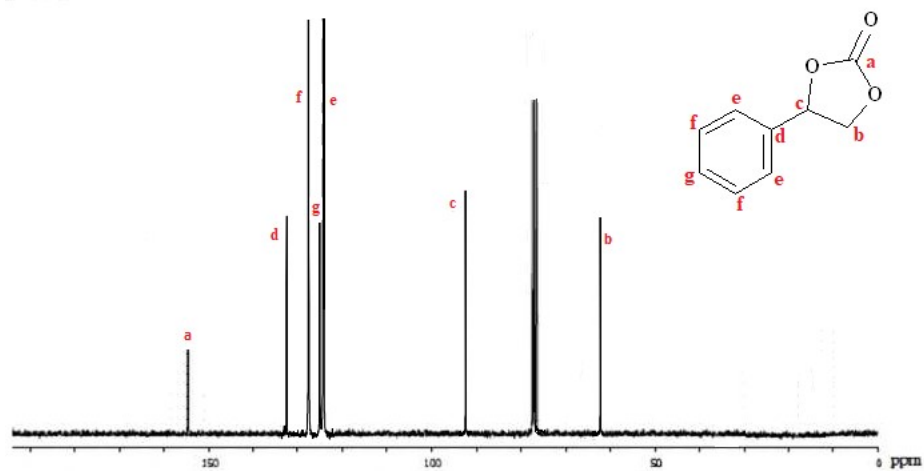

**Figure S12.**  $^{13}\text{C}$  NMR spectra of 4-phenyl-1,3-dioxolan-2-one (Table 2, entry 6)

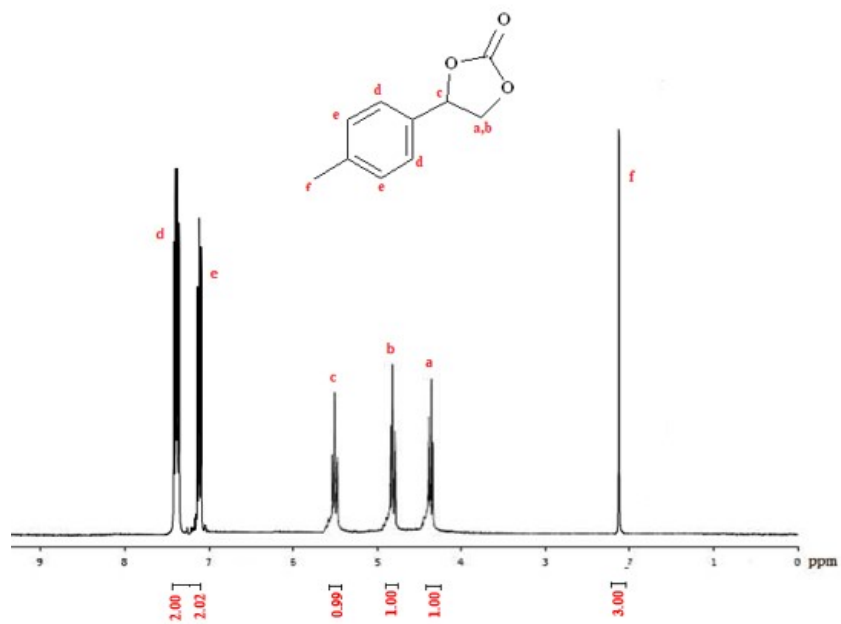

**Figure S13.** <sup>1</sup>H NMR spectra of 4-(p-tolyl)-1,3-dioxolan-2-one (Table 2, entry 7).

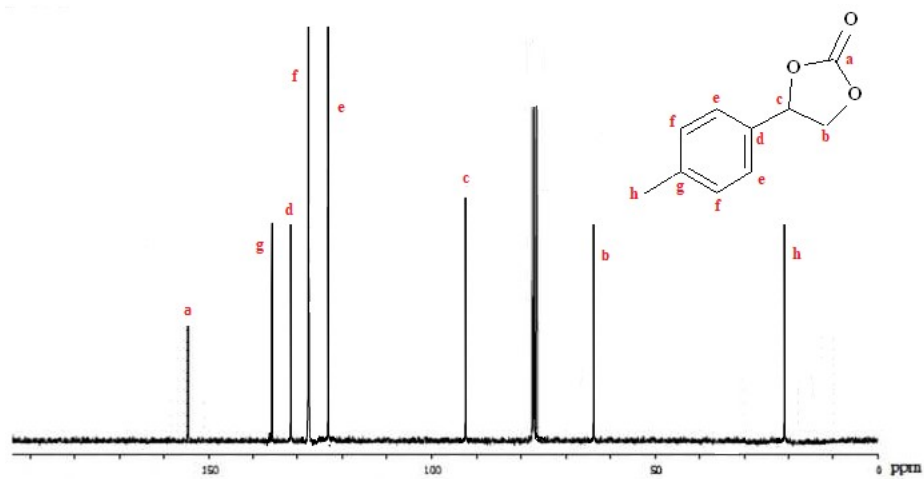

**Figure S14.** <sup>13</sup>C NMR spectra of 4-(p-tolyl)-1,3-dioxolan-2-one (Table 2, entry 7)



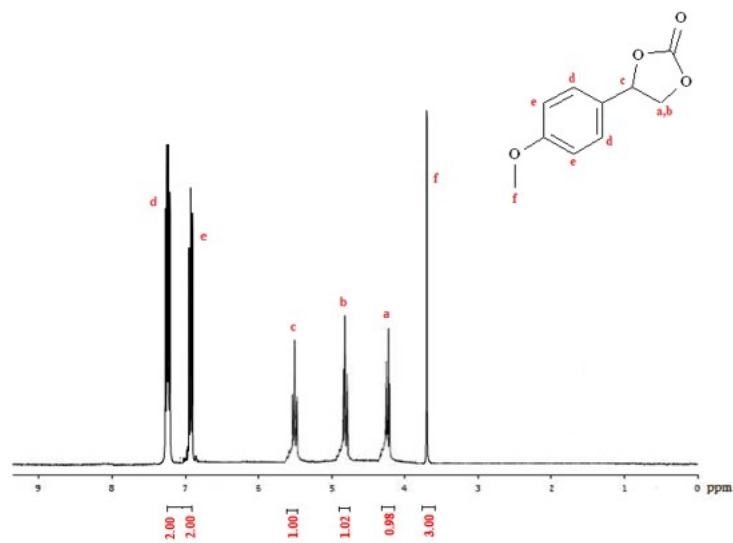

**Figure S15.**  $^1\text{H}$  NMR spectra of 4-(4-methoxyphenyl)-1,3-dioxolan-2-one (Table 2, entry 8).

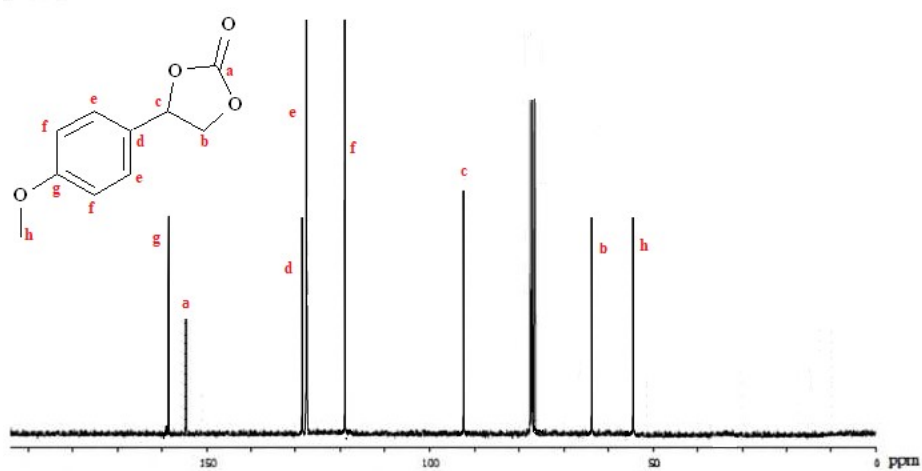

**Figure S16.**  $^{13}\text{C}$  NMR spectra of 4-(4-methoxyphenyl)-1,3-dioxolan-2-one (Table 2, entry 8)

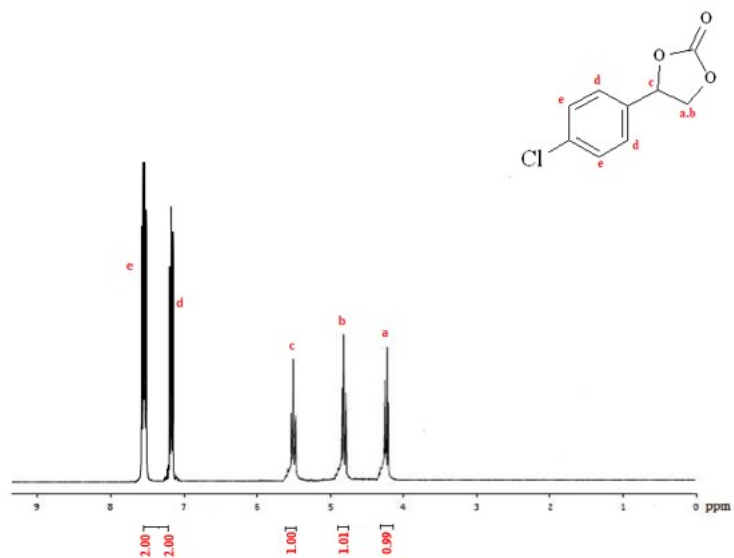

**Figure S17.**  $^1\text{H}$  NMR spectra of 4-(4-chlorophenyl)-1,3-dioxolan-2-one (Table 2, entry 9).

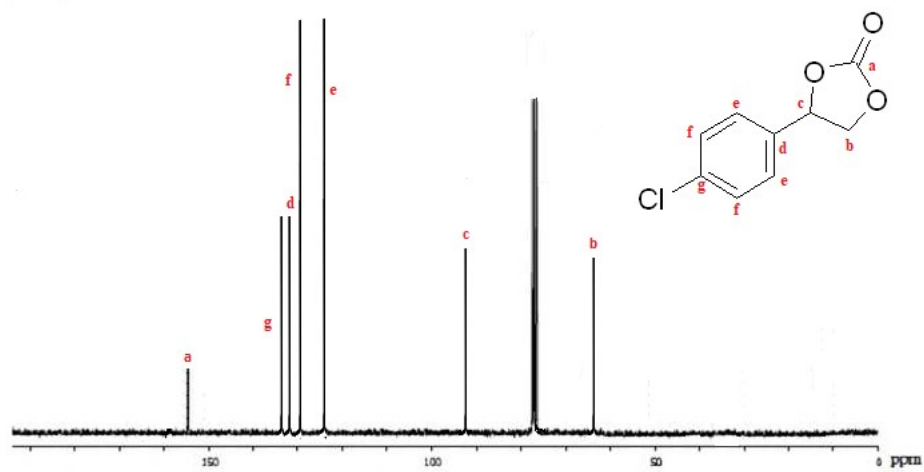

**Figure S18.**  $^{13}\text{C}$  NMR spectra of 4-(4-chlorophenyl)-1,3-dioxolan-2-one (Table 2, entry 9)
